# Supplementary material
Source: PubMed Central journal article supplement (PMC5935874)
Supplement: mmc1.pdf [file mmc1.pdf]

|                     |  |  |  |  |  |  |  |
|---------------------|--|--|--|--|--|--|--|
| COSTOP trial number |  |  |  |  |  |  |  |
|---------------------|--|--|--|--|--|--|--|

Date of form    

|   |   |
|---|---|
| D | D |
|---|---|

|   |   |   |
|---|---|---|
| M | M | M |
|---|---|---|

|   |   |   |   |
|---|---|---|---|
| 2 | 0 | Y | Y |
|---|---|---|---|

    Clinic/ hosp. number    

|  |  |  |  |  |  |  |  |  |  |
|--|--|--|--|--|--|--|--|--|--|
|  |  |  |  |  |  |  |  |  |  |
|--|--|--|--|--|--|--|--|--|--|

Date of birth    

|   |   |
|---|---|
| D | D |
|---|---|

|   |   |   |
|---|---|---|
| M | M | M |
|---|---|---|

|   |   |   |   |
|---|---|---|---|
| Y | Y | Y | Y |
|---|---|---|---|

    Patient initials    

|  |  |
|--|--|
|  |  |
|--|--|

    Male     Female

Hello. I am \_\_\_\_\_ from \_\_\_\_\_

We are working with the MRC/UVRI Uganda Research Unit on AIDS to review your participation in the COSTOP trial which is now at its conclusion. We will be asking you questions about your participation in the COSTOP trial. The information about you and your responses to these questions will be used by the researchers at MRC/UVRI Uganda when reporting on the COSTOP trial, to describe the extent to which participants in either study group of COSTOP complied with the requirements of the study protocol. This information will be very useful in explaining the overall results of the COSTOP trial. All information obtained from this enquiry will be kept confidential and none of it will be presented in such a way that you can be identified.

We are asking your help to ensure that the information we collect is accurate. You may refuse to answer any question or choose to stop the interview at any time.

Do you have any questions about this interview?

Do I have your permission to proceed?

Nkulamusizza Ssebo/nnyabo, amannya gange nze..... okuva.....

Tukola n'ekitongole kya MRC/UVRI Uganda Research unit on AIDS okwekeneenya okweetaba kwo mu kunonyereza kwa COSTOP okw'okugezesa okuli mukitundu kyakwo ekyakamalilizo. Tujja ku kubuuzza ebibuuzo ebikwata ku kwetaaba kwo mu kunonyereza kwa COSTOP. Amawulire gonna agakukwatako ne by'onooba oyanukudde bijja kukozezebwa abakola ku gw'okunonyereza mu kitongole kya MRC/UVRI Uganda bwebanaaba bawa alipoota ku kunonyereza kwa COSTOP nga banyonyonyola engeri abeetaba mukunonyereza okuva mu bibinja byombi gye bagoberera amateeka g'okunonyereza. Amawulire gano gagya kuba gamugaso okunyonyola ebivudde mu kunonyereza kwa COSTOP okw'okugezesa kwonna awamu. Amawulire gonna aganafunibwa mu kunonyereza kuno gajja kukuumbwa nga gakyama era tewali ggulire na limu lijja kuweebwayo nga liliko erinnya.

*Tukasaba okutuyamba okulaba nga amawulire gonna gwetukunganya matuufu.*

*Oyinja okugaana okuddamu ekibuuzo kyonna oba okusalawo okukomya okubuuzibwa ebibuuzo akadde konna.*

*Olina ekibuuzo kyonna?*

*Nzikirizibwa okugenda mu maaso?*

1. What were the main reasons for you deciding to join the COSTOP study? Give as many of the following reasons as you like.

*Nsonga/bintu ki ebikulu byewasinziirako okusalawo okwetaba mukunonyereza kwa COSTOP. Mennya zonna ku zino wammanga.*

- Find out whether stopping Septrin is safe  
*Okuzuula ng'oba okuva ku septrin tekirina bulabe*
- Try out a new medicine  
*Okugezaako edaggala eppya*
- Help others (by participating in research)  
*Okuyamba abalala (okwetaba mu kunonyereza)*
- Get treatment  
*Okufuna obujanjabi*
- Improve my health  
*Okulongoosa eby'obulamu bwange*
- Get CD4 count and other tests  
*Okukeberegwa obutafaali bwo'musaayi ne bintu ebirala*
- Financial benefits  
*Okufuna obuyambi bwensimbi*
- Other reasons: please specify  
*Ne'birala; bimenye*
  - .....
  - .....
  - .....

2. At the time of joining the trial what outcome did you expect on your health during the study?

*Mu kiseera wewayingirira mu kunonyereza, bibala ki byewali osuubira okufuna mu bulamu bwo?*

- Better  
*Birungi nnyo*
- Same  
*Tewali njawulo*
- Worse  
*Bibi nnyo*

3. During the trial you have been asked questions about the following: missing trial drug doses, taking open label Septrin, missing ART drug doses and use of Insecticide Treated Mosquito Net (ITN). Which questions did you find difficult to answer honestly? (Tick all that apply)

*Mu kiseera ky'okunonyereza/ky'okugezesebwa, obuziddwa ebibuuzo ku; kuyosa okumira edaggala erigezesebwa, okumira septrin alambiddwa, okwosa okumira eddagala eriweweza ku kawuka akaleeta siriimu, n'okukozesa akatimba kensiri akalimu eddagala (ITN). Kubibuuzo ebyo, kiriwa ekyakukaluubiriza okuddamu mu butuufu byakyo.*

- Missing trial drug doses  
*Okwosa okumira edaggala erigezesebwa*
- Taking open label Septrin  
*Okumira septrin alambiddwa*
- Missing ART drug doses  
*Okwosa okumira edaggala eriweweza ku kawuka akaleeta siriimu*
- Use of Insecticide Treated Mosquito Net (ITN)  
*Okukozesa akatimba kensiri akalimu eddagala (ITN)*
- All the above  
*Byonna ebyo*
- None of the above  
*Tewali nakimu kw'ebyo*

| Interviewer's signature | Print name | Date |
|-------------------------|------------|------|
|                         |            |      |

**Form 26**  
**Participant Exit Interview Form**

|                     |  |  |  |  |  |  |  |  |  |  |  |
|---------------------|--|--|--|--|--|--|--|--|--|--|--|
| COSTOP trial number |  |  |  |  |  |  |  |  |  |  |  |
|---------------------|--|--|--|--|--|--|--|--|--|--|--|

Date of form

|   |   |   |   |   |   |   |   |   |                      |  |  |  |  |  |  |  |  |  |  |  |  |
|---|---|---|---|---|---|---|---|---|----------------------|--|--|--|--|--|--|--|--|--|--|--|--|
| D | D | M | M | M | 2 | 0 | Y | Y | Clinic/ hosp. number |  |  |  |  |  |  |  |  |  |  |  |  |
|---|---|---|---|---|---|---|---|---|----------------------|--|--|--|--|--|--|--|--|--|--|--|--|

4. When you compare your frequency of swallowing Septrin before the trial to swallowing the trial drug during the trial, do you think you swallowed the trial drug more or less compared to Septrin before the trial?  
*Bwogerageranya emirundi gyewali omira septrin nga tonayingira mu kunonyereza ne'mirundi gyomize eddagala erigezesebwa, olowooza wamira edaggala erigezesebwa emirundi mitono bwogerageranya ne septrin luli ng'okunonyereza tekunabaawo?*

- More  
*Emirundi mingi*
- Same  
*Emirundi gyegimu*
- Less  
*Emirundi mitono*

5a. At the start of this study did you have any Septrin left with you from the stock you had before joining the study?  
*Kuntandikwa y'okunonyereza kuno wali olinawo Septrin yenna eyali asigaddewo ku daggala lyewalina nga tonetaba mukunonyereza?*

- Yes  
*Yee [nalina]*
- No  
*Nedda [salina]*
- I don't remember  
*Sijukira*

5b. If yes where did you put it?  
*Oba yee, waliteeka wa?*

- Threw it away  
*Nalisuula*
- Brought to COSTOP study clinic  
*Nalileeta ku clinic ya COSTOP*
- Swallowed it along with the study Septrin  
*Nalimirira wamu ne Septrin agezesebwa*
- Gave it out to other patients or family member  
*Namuwa abalwadde/abenganda abalala*
- Gave it to ART service provider  
*Namugabira abagaba edaggala eriweweeza ku kawuka akaleeta siriimu*
- Other (specify).....  
*Ekirala [kimenye].....*

6. How often did you miss taking the trial drugs but then forget to report it in the interview?  
*Mirundi emeka gyewerabira okumira edaggala erigezesebwa naye newerabira okukyogera nga bakubuuzza ebibuuzo?*

- Never  
*Tewali [mulundi nagumu]*
- Rarely  
*Kyali tekitera kubaawo*
- Regularly  
*Emirundi egisinga*

7. How often did you report taking the trial drug during the interview when in fact you had missed some doses?  
*Mirundi emeka gyewayogera nti wamize edaggala erigezesebwa naye nga mubutuufu wayosezaamu?*

- Never  
*Tewali*
- Rarely  
*Nali sitera*
- Regularly  
*Emirundi egisinga*

8a. Did you discuss with other participants in the trial about your experience with the trial drug?  
*Wanyumyamu ko n'abantu abalala abetabye mukunonyereza ku ngeri gy'osanze mu eddagala erigezesebwa?*

- Yes  
*Yee*
- No  
*Nedda*

8b. If yes did this encourage or discourage you from taking the trial drug?  
*Oba yee, kino kyakuwa amaanyi oba kyakumalamu amaanyi okumira edaggala erigezesebwa?*

- Encourage  
*Kyampa amaanyi*
- Discourage  
*Kyammalamu amaanyi*

9. In your discussions, do you know of any participant in the trial that missed taking the trial drug but found it difficult admitting they had missed when they were asked in the interview?  
*Nga mukubaganya ebirowoozo, olina omuntu yenna ku betabye mukunonyereza gw'omanyi eyayosa okumira edaggala erigezesebwa naye nekimuzibuwalira okwogera nti teyamira bweyali abuziddwa?*

- Yes  
*Yee*
- No  
*Nedda*
- Don't remember  
*Sijjukira*

10a. Did you ever swallow/take Septrin from any other source outside the study for any reason?  
*Wali omizeeko septrin olw'ensonga yonna ng'omugya mukifo ekirala kyonna ekitali kino?*

- Yes  
*Yee*
- No  
*Nedda*

10b. If yes, how often did this happen?  
*Oba yee, kino kyabeerawo emirundi emeka?*

- Rarely  
*Tekitera*
- Regularly  
*Emirundi egisinga*

|                         |            |      |
|-------------------------|------------|------|
| Interviewer's signature | Print name | Date |
|                         |            |      |

**Form 26**  
**Participant Exit Interview Form**

|                     |  |  |  |  |  |  |  |
|---------------------|--|--|--|--|--|--|--|
| COSTOP trial number |  |  |  |  |  |  |  |
|---------------------|--|--|--|--|--|--|--|

Date of form

|   |   |   |   |   |   |   |   |   |                      |  |  |  |  |  |  |  |  |  |
|---|---|---|---|---|---|---|---|---|----------------------|--|--|--|--|--|--|--|--|--|
| D | D | M | M | M | 2 | 0 | Y | Y | Clinic/ hosp. number |  |  |  |  |  |  |  |  |  |
|---|---|---|---|---|---|---|---|---|----------------------|--|--|--|--|--|--|--|--|--|

- 10c. If you took any Septrin from other source, from where did you get it?  
*Bwoba nga wamira septrin okuva ewalala, wa wennyini we wamugya?*
- Friend/family member  
*Mikwano/abenganda*
  - TASO or other HIV care organisation  
*TASO oba ekitongole ekirala ekiribirira abalina akawuka ka siriimu*
  - Bought from pharmacy  
*Okugula awatundirwa edaggala*
- 10d. If you took any Septrin from other source, for what reason did you get it ?  
*Bw'oba wamira septrin okuva ewalala, wamufuna lwa nsonga ki?*
- Prophylaxis of Opportunistic Infections (OIs)  
*Kuziyiza endwadde zinakigwanyizi*
  - Treatment of Opportunistic Infections  
*Okujanjaba endwadde zinakigwanyizi*
  - Treating fever  
*Kujanjaba musujja*
  - Pain/fatigue relief  
*Kuweweeza ku bulumi/bukoowu*
  - Treating Sexually Transmitted Infections (STIs)  
*Kujanjaba ndwadde zakikaba*
  - Other (Specify) .....  
*Ekirala [kimenye]*
11. How often did you share your trial drug with other participants or family members?  
*Mirundi emeka gyewagabana edaggalal lyo erigezesebwa n'abantu abalala oba abenganda zo?*
- Never  
*Tewali*
  - Rarely  
*Sitera*
  - Regularly  
*Emirundi egisinga*
12. If we show that it is safe to discontinue Cotrimoxazole (Septrin) prophylaxis among HIV positive adults stabilized on ART how likely do you think it would be that:  
*Singa tulaga nti okukomya okumira septrin mu bantu abakulu abalina akawuka nga batederde bulungi ku daggala eriweweeza akawuka ka siriimu gwe olowooza kiyinza kuba kitya?*
- 12a. If you are stable on ART you would want to regularly continue swallowing Septrin? Would you say:  
*Bwoba ng'otererde bulungi ku daggala eriweweeza akawuka ka siriimu, wandiyagadde okumira septrin buli lunaku? Wandigambye:*
- Very likely  
*Nandiyagadde nnyo*
  - Somewhat likely  
*Nandyagadde mu*
  - Or not likely  
*Sandyagadde*

- 12b. Would you encourage or discourage your friends who are stable on ART to discontinue Septrin?  
*Wandiwigidde/ tewandiwigidde banno abatererde obulungi ku daggala eriweweeza akawuka akaleeta siriimu okuva ku septrin?*
- Encourage  
*Nandibawagidde*
  - Discourage  
*Sandibawagidde*
13. Have you ever tried to guess the trial arm you were allocated?  
*Wali ogeezezaako okuteeba ekibinja ekigezesebwa ky'olimu?*
- Yes  
*Yee*
  - No  
*Nedda*
- 13a. Did your guess influence your adherence to taking the trial drug and/or stay in the study?  
*Okuteebereza kwo kulina kyekwakola ku ngeri gy'otekeddwa okumiramu edaggala erigezesebwa/oba okusigala mu kunonyereza?*
- Yes  
*Yee*
  - No  
*Nedda*
- 13b. Which trial arm did you presume you were on?  
*Kibinja ki ekigezesebwa ky'ewasuubira nti mwoli?*
- Septrin arm  
*Ekya septrin*
  - Placebo arm  
*Eky'empeke etariimu kirungo/kigumaaza*
  - Don't know  
*Simannyi*
14. Do you know a safe water vessel (WaterGuard Jerrican or container, etc.)  
*Omannyi ekitereka amazzi amayonjo? (ekidomola oba kontayina ya WaterGuard, n'ebirala)*
- Yes  
*Yee*
  - No  
*Nedda*
15. Do you use a safe water vessel (WaterGuard Jerrican, container, etc.) in your home?  
*Okozesa ekintu ekitereka amazzi amayonjo (ekidomola oba kontayina ya WaterGuard, nebirala) mu maka go?*
- Yes  
*Yee*
  - No  
*Nedda*

| Interviewer's signature | Print name | Date |
|-------------------------|------------|------|
|                         |            |      |
